# Supplementary material for: Nutritional Characterization, Antioxidant, and Lipid-Lowering Effects of Yellow Mombin (Spondias mombin) Supplemented to Rats Fed a High-Fat Diet
Source: MDPI journal article supplement (doi:10.3390/foods11193064), 2022-10-02
Supplement: s1 [file s1]

## Supplementary material

**Table S1.** Composition of the normal-fat and high-fat diets consumed by Wistar rats treated or not with yellow mombin.

| <b>Ingredients (g/100g)</b>  | <b>NF</b> | <b>HF</b> |
|------------------------------|-----------|-----------|
| Milk casein                  | 14.00     | 16.50     |
| Maize starch                 | 47.00     | 36.45     |
| Dextrinized starch           | 15.50     | 15.50     |
| Sucrose                      | 10.00     | 6.00      |
| Fibre                        | 5.00      | 5.00      |
| Soybean oil                  | 4.00      | 3.00      |
| Lard (animal fat)            | -         | 6.00      |
| Non-hydrolyzed vegetable fat | -         | 5.00      |
| Cholic acid                  | -         | 0.50      |
| Cholesterol                  | -         | 1.00      |
| Mineral mix AIN -93M         | 3.50      | 3.50      |
| Vitamin mix                  | 1.00      | 1.00      |
| L-cysteine                   | 0.18      | 0.30      |
| Hill bitartrate              | 0.25      | 0.25      |
| t-BHQ                        | 0.008     | 0.014     |
| Energy value (kcal/g)        | 3.82      | 4.25      |
| Carbohydrates (kcal %)       | 75.77     | 54.54     |
| Proteins (kcal %)            | 14.82     | 15.81     |
| Lipids (kcal %)              | 9.40      | 29.64     |

NF= normal fat-diet/AIN-93M diet maintenance proposed by American Institute of Nutrition (AIN) [35]; HF= high-fat diet (Rhoister Industria and Comércio Ltda); t-BHQ= tert-butylhydroquinone.

**Table S2.** Fatty acid composition of the normal-fat and high-fat diets consumed by Wistar rats treated or not with yellow mombin.

| <b>Fatty Acids (FA) (g/100g)</b>          | <b>NF</b>    | <b>HF</b>    |
|-------------------------------------------|--------------|--------------|
| Decanoic acid C10:0                       | 0.02± <0.01  | 0.05± <0.01  |
| Dodecanoic acid C12:0                     | -            | 0.09±<0.01   |
| Tetradecanoic acid C14:0                  | 0.13± 0.01   | 1.01±0.02    |
| Pentadecanoic acid C15:0                  | -            | 0.05±<0.01   |
| Hexadecanoic acid C16:0                   | 12.83± 0.08  | 28.65±0.18   |
| Heptadecanoic acid C17:0                  | 0.08± <0.01  | 0.34±<0.01   |
| Stearate acid C18:0                       | 3.80±0.05    | 17.21±0.05   |
| Eicosanoic acid C20:0                     | 0.33±0.04    | 0.50±<0.01   |
| Docosanoic acid C22:0                     | 0.38±0.05    | 0.37±<0.01   |
| <b>Saturated Fatty Acids (SFA)</b>        | <b>17.62</b> | <b>48.34</b> |
| 9-Hexadecenoic acid C16:1 ω7              | -            | 1.72±<0.01   |
| Cis-10-Heptadecenoic acid C17:1           | -            | 0.10±<0.01   |
| 11-Octadecenoic acid C18:1 ω7             | -            | 0.94±0.06    |
| cis-13-Octadecenoic acid C18:1            | -            | 0.82 ±0.02   |
| Octadecenoic acid C18:1 ω 9               | 22.46±0.08   | 6.78±0.06    |
| 9-Octadecenoic acid C18:1 ω9t             | -            | 0.18±0.02    |
| cis-13-Eicosenoic acid C20:1 ω7           | -            | 0.62±0.01    |
| <b>Monounsaturated Fatty Acids (MUFA)</b> | <b>22.46</b> | <b>11.16</b> |
| 9,12-Octadecadienoic acid C18:2 ω6c       | 53.88±0.04   | 37.02 ±0.32  |
| 9,12,15-Octadecatrienoic acid C18:3 ω3    | 6.04±0.06    | 2.83 ±0.01   |
| cis-11,14-Eicosadienoic acid C20:2 ω6     | -            | 0.46±0.04    |
| 5,8,11,14-Eicosatetraenoic acid C20:4 ω6  | -            | 0.18±0.01    |
| <b>Polyunsaturated Fatty Acids (PUFA)</b> | <b>59.90</b> | <b>40.50</b> |

NF= normal fat-diet/AIN-93M diet maintenance proposed by American Institute of Nutrition (AIN) [35]; HF= high-fat diet (Rhoister Industria and Comércio Ltda).
